# Supplementary material for: Profiles of Small Regulatory RNAs at Different Growth Phases of Streptococcus thermophilus During pH-Controlled Batch Fermentation
Source: Front Microbiol. 2021 Nov 30;12:765144. doi: 10.3389/fmicb.2021.765144 (PMC8753986; doi:10.3389/fmicb.2021.765144)
Supplement: Supplementary file 2 [file Table_2.XLSX]

## Sheet: Sheet
sts034				sts072				sts187				sts238				sts248				sts249				sts251				sts347				sts392				sts425
Rank	Target Gene Name	Energy kcal/mol	Annotation	Rank	Target Gene Name	Energy kcal/mol	Annotation	Rank	Target Gene Name	Energy kcal/mol	Annotation	Rank	Target Gene Name	Energy kcal/mol	Annotation	Rank	Target Gene Name	Energy kcal/mol	Annotation	Rank	Target Gene Name	Energy kcal/mol	Annotation	Rank	Target Gene Name	Energy kcal/mol	Annotation	Rank	Target Gene Name	Energy kcal/mol	Annotation	Rank	Target Gene Name	Energy kcal/mol	Annotation	Rank	Target Gene Name	Energy kcal/mol	Annotation
1	rlmH	-21.57	23S rRNA (pseudouridine(1915)-N(3))-methyltransferase RlmH	1	FGY93_RS18870	-205.97	HU family DNA-binding protein	1	N/A	-98.04	Derived by automated computational analysis using gene prediction method: Protein Homology.	1	oppA	-118.64	oligopeptide ABC transporter substrate-binding protein	1	H0506_RS02910	-24.24	thymidylate synthase	1	N/A	-30.91	Derived by automated computational analysis using gene prediction method: Protein Homology.	1	lacC	-215.99	tagatose-6-phosphate kinase	1	liang_rs05350	-21.07	calcium-translocating P-type ATPase PMCA-type	1	N/A	-10.52	Derived by automated computational analysis using gene prediction method: Protein Homology.	1	DNA52_RS14245	-20.9	threonine/serine exporter
2	leuS	-18.41	leucine--tRNA ligase	2	rplK	-31.94	50S ribosomal protein L11	2	LOC100790222	-190.63	30S ribosomal protein S21	2	abc	-15.53	ABC transporter ATP-binding protein	2	H0506_RS03820	-22.83	calcium-translocating P-type ATPase PMCA-type	2	rfbC	-20.47	dTDP-4-dehydrorhamnose 3 5-epimerase	2	kdul	-23.68	5-dehydro-4-deoxy-D-glucuronate isomerase	2	thyA	-23.9	thymidylate synthase	2	SSUBM407_RS08450	-16.92	NusG domain II-containing protein	2	CPF_RS02920	-18.15	amino acid ABC transporter permease
3	murA	-17.54	UDP-N-acetylglucosamine 1-carboxyvinyltransferase	3	atpA	-31.66	F0F1 ATP synthase subunit alpha	3	N/A	-28.14	Derived by automated computational analysis using gene prediction method: Protein Homology.	3	gyrB	-15.45	DNA topoisomerase (ATP-hydrolyzing) subunit B	3	amaP	-21.08	alkaline shock response membrane anchor protein AmaP	3	N/A	-19.43	Derived by automated computational analysis using gene prediction method: Protein Homology.	3	H0506_RS02910	-18.03	thymidylate synthase	3	N/A	-23.31	Derived by automated computational analysis using gene prediction method: Protein Homology.	3	N/A	-17.67	Derived by automated computational analysis using gene prediction method: Protein Homology.	3	liang_rs09555	-19.08	transcriptional regulator
4	lipF	-18.32	carboxylesterase	4	kbaY	-33.1	tagatose-bisphosphate aldolase	4	murG	-17.86	undecaprenyldiphospho-muramoylpentapeptide beta-N-acetylglucosaminyltransferase	4	H0506_RS01585	-14.73	MFS transporter	4	H0506_RS00480	-20.75	NAD(P)-dependent oxidoreductase	4	N/A	-20.21	Derived by automated computational analysis using gene prediction method: Protein Homology.	4	abc	-24.16	ABC transporter ATP-binding protein	4	DQ04_04341000	-22.17	NAD(P)-dependent oxidoreductase	4	aspC	-17.58	aspartate aminotransferase	4	NECHADRAFT_98508	-17.02	glycoside hydrolase family 1 protein
5	dnaQ	-15.83	DNA polymerase III subunit epsilon	5	parB	-25.75	chromosome partitioning protein ParB	5	TARDBP	-25.14	DNA-binding protein	5	N/A	-14.76	Derived by automated computational analysis using gene prediction method: Protein Homology.	5	N/A	-22.43	Derived by automated computational analysis using gene prediction method: Protein Homology.	5	H354_RS14060	-18.29	alpha-galactosidase	5	dnal	-29.05	primosomal protein DnaI	5	trsG	-22.74	TrsG protein	5	cspA	-16.8	cold-shock protein	5	secY	-17.05	preprotein translocase subunit SecY
6	tadA	-15.64	tRNA adenosine(34) deaminase TadA	6	lmo2369	-20.4	general stress protein	6	tig	-18.29	trigger factor	6	N/A	-14.57	Derived by automated computational analysis using gene prediction method: Protein Homology.	6	H0506_RS01585	-22.66	MFS transporter	6	marR	-21.03	MarR family transcriptional regulator	6	cdr	-17.72	CoA-disulfide reductase	6	amaP	-21.11	alkaline shock response membrane anchor protein AmaP	6	N/A	-19.59	Derived by automated computational analysis using gene prediction method: Protein Homology.	6	ID12_RS02335	-16.11	LytR family transcriptional regulator
7	cpxA	-14.62	sensor histidine kinase	7	pyrC	-24.91	dihydroorotase	7	glnA	-19.55	type I glutamate--ammonia ligase	7	H0506_RS06450	-14.42	DNA-binding response regulator	7	H0506_RS07265	-23.08	nucleoid-associated protein YbaB/EbfC family	7	H0506_RS04485	-19.71	ABC transporter permease	7	ybeY	-25.93	rRNA maturation RNase YbeY	7	N/A	-22.09	Derived by automated computational analysis using gene prediction method: Protein Homology.	7	arcB	-11.34	sensor histidine kinase	7	BBNG_RS0106075	-16.29	TIGR03943 family protein
8	metK	-14.61	methionine adenosyltransferase	8	ftsA	-21.21	cell division protein FtsA	8	groES	-17.05	co-chaperone GroES	8	rnpA	-14.32	ribonuclease P protein component	8	N/A	-21.37	Derived by automated computational analysis using gene prediction method: Protein Homology.	8	pstA	-18.3	phosphate ABC transporter permease protein PstA	8	H0506_RS07625	-19.92	aquaporin family protein	8	phoU	-22.11	phosphate transport system regulatory protein PhoU	8	N/A	-16.72	Derived by automated computational analysis using gene prediction method: Protein Homology.	8	TGS1	-14.83	RNA methyltransferase
9	hfq	-14.33	RNA-binding protein	9	PV09_06668	-24.57	calcium-translocating P-type ATPase PMCA-type	9	IMD2	-17.19	IMP dehydrogenase	9	H354_RS19310	-14.18	bifunctional 2-keto-4-hydroxyglutarate aldolase/2-keto-3-deoxy-6-phosphogluconate aldolase	9	N/A	-21.14	Derived by automated computational analysis using gene prediction method: Protein Homology.	9	N/A	-22.84	Derived by automated computational analysis using gene prediction method: Protein Homology.	9	glpO	-29.16	glycerol-3-phosphate dehydrogenase/oxidase	9	HL854_RS25240	-21.85	PTS mannose/fructose/sorbose transporter subunit IIB	9	liang_rs08845	-15.58	DUF4809 domain-containing protein	9	N/A	-14.94	Derived by automated computational analysis using gene prediction method: Protein Homology.
10	rimP	-14.43	ribosome maturation factor RimP	10	glnA	-24.35	type I glutamate--ammonia ligase	10	LOC100283702	-16.33	50S ribosomal protein L33	10	H0506_RS01470	-13.81	ECF transporter S component	10	trsG	-21.31	TrsG protein	10	abc	-19.68	ABC transporter ATP-binding protein	10	H0506_RS04485	-19	ABC transporter permease	10	H0506_RS04485	-21.56	ABC transporter permease	10	CPF_RS02835	-15.64	AI-2E family transporter	10	abc	-14.3	ABC transporter ATP-binding protein
11	hfq	-14.24	RNA-binding protein	11	melA	-24.56	alpha-galactosidase	11	pyrC	-18.89	dihydroorotase	11	H0506_RS01300	-14.14	DUF1273 domain-containing protein	11	H354_RS15245	-20.72	PTS beta-glucoside transporter subunit EIIBCA	11	glmU	-18.5	N-acetyltransferase	11	H0506_RS07845	-22.41	Cof-type HAD-IIB family hydrolase	11	aspC	-21.54	aspartate aminotransferase	11	N/A	-12.74	Derived by automated computational analysis using gene prediction method: Protein Homology.	11	AzlD domain-containing protein	-15.37	AzlD domain-containing protein
12	SIL_RS05045	-14.19	DUF402 family protein	12	groL	-19.28	chaperonin GroEL	12	murA	-15.31	UDP-N-acetylglucosamine 1-carboxyvinyltransferase	12	N/A	-13.58	Derived by automated computational analysis using gene prediction method: Protein Homology.	12	levE	-21.12	PTS mannose/fructose/sorbose transporter subunit IIB	12	rbsC	-21.21	ribose uptake protein	12	H0506_RS06695	-19.58	glycosyltransferase family 8 protein	12	H0506_RS01760	-20.9	NCS2 family permease	12	rpsT	-11.77	30S ribosomal protein S20	12	prmC	-14.99	peptide chain release factor N(5)-glutamine methyltransferase
13	fhuC	-14.28	iron ABC transporter permease	13	infA	-20.92	translation initiation factor IF-1	13	ptsG	-16.64	PTS glucose transporter subunit IIBC	13	trpE	-13.66	anthranilate synthase component I	13	glnA	-19.03	type I glutamate--ammonia ligase	13	hpr	-17.19	phosphocarrier protein HPr	13	H0506_RS00900	-12.48	50S ribosomal protein L11 methyltransferase	13	nrdD	-19.83	anaerobic ribonucleoside-triphosphate reductase	13	malG	-15.15	ABC transporter permease	13	liang_rs05165	-15.11	LPXTG family cell surface protein Fms3
14	pflB	-14.4	formate C-acetyltransferase	14	LCAZH_RS06855	-24.24	DUF1836 domain-containing protein	14	rimJ	-20.19	N-acetyltransferase	14	ruvB	-13.34	Holliday junction branch migration DNA helicase RuvB	14	phoU	-20.65	phosphate transport system regulatory protein PhoU	14	H0506_RS06205	-16.4	alpha/beta hydrolase	14	rfbD	-20.09	dTDP-4-dehydrorhamnose reductase	14	N/A	-22.09	nucleoid-associated protein YbaB/EbfC family	14	Mppe	-13.32	metallophosphoesterase	14	gpsA	-15.1	NAD(P)H-dependent glycerol-3-phosphate dehydrogenase
15	LOC11405423	-13.92	MutS2 family protein	15	rpoD	-22	RNA polymerase sigma factor RpoD	15	DK182_RS06310	-15.99	BMP family ABC transporter substrate-binding protein	15	str0981	-12.79	AraC family transcriptional regulator	15	trpC	-20.74	indole-3-glycerol phosphate synthase TrpC	15	H0506_RS03930	-19.6	formate--tetrahydrofolate ligase	15	H0506_RS06450	-17.56	DNA-binding response regulator	15	rfbD	-20.71	dTDP-4-dehydrorhamnose reductase	15	GZ59_RS02025	-14.16	DUF898 domain-containing protein	15	mraZ	-15.26	transcriptional regulator MraZ
16	SD90_RS00675	-14.1	competence protein ComG	16	N/A	-17.65	Derived by automated computational analysis using gene prediction method: Protein Homology.	16	DYE31_RS11225	-13.74	type II toxin-antitoxin system Phd/YefM family antitoxin	16	uvrB	-13.1	excinuclease ABC subunit UvrB	16	XNR_RS05690	-19.5	DUF448 domain-containing protein	16	tuf	-17.63	elongation factor Tu	16	H0506_RS00725	-11.91	bifunctional hydroxymethylpyrimidine kinase/phosphomethylpyrimidine kinase	16	N/A	-19.06	Derived by automated computational analysis using gene prediction method: Protein Homology.	16	N/A	-13.89	Derived by automated computational analysis using gene prediction method: Protein Homology.	16	brnQ	-13.5	branched-chain amino acid transport system II carrier protein
17	KN10_RS00040	-14.24	YqeG family HAD IIIA-type phosphatase	17	epsC	-22.55	tyrosine-protein kinase transmembrane modulator EpsC	17	abc	-16.4	ABC transporter ATP-binding protein	17	H0506_RS06800	-13.08	pseudouridylate synthase	17	csbD	-20.58	CsbD family protein	17	STER_1323	-20.35	PTS system cellobiose-specific IIC component	17	argR	-23.38	arginine repressor	17	N/A	-20.45	Derived by automated computational analysis using gene prediction method: Protein Homology.	17	rpmG	-14.7	50S ribosomal protein L33	17	FQU78_RS09305	-15.14	ferredoxin
18	pncB	-13.52	nicotinate phosphoribosyltransferase	18	der	-21.66	ribosome biogenesis GTPase Der	18	NUDT11	-13.74	NUDIX hydrolase	18	cwlQ	-12.95	muramidase	18	ponA	-14.28	multimodular transpeptidase-transglycosylase	18	pepT	-19.3	peptidase T	18	N/A	-21.43	Derived by automated computational analysis using gene prediction method: Protein Homology.	18	pbpC	-14.34	multimodular transpeptidase-transglycosylase	18	H0506_RS07035	-10.43	QueT transporter family protein	18	nucA	-12.92	DNA-entry nuclease
19	N/A	-13.7	DUF520 domain-containing protein	19	arsR	-20.99	ArsR family transcriptional regulator	19	N/A	-19.35	Derived by automated computational analysis using gene prediction method: Protein Homology.	19	galR	-13.47	galactose operon repressor galR	19	E3C75_RS09370	-18.81	PTS sugar transporter subunit IIC	19	H0506_RS05270	-18.52	cation-translocating P-type ATPase	19	glmU	-25.3	N-acetyltransferase	19	N/A	-20.29	glycosyltransferase family 2 protein	19	rpsS	-13.3	30S ribosomal protein S19	19	SSUBM407_RS02780	-15.09	XRE family transcriptional regulator
20	proS	-13.38	proline--tRNA ligase	20	folD	-21.78	bifunctional methylenetetrahydrofolate dehydrogenase/methenyltetrahydrofolate cyclohydrolase	20	ftsA	-15.6	cell division protein FtsA	20	phoU	-12.92	phosphate transport system regulatory protein PhoU	20	lpdA	-17.46	dihydrolipoyl dehydrogenase	20	brnQ	-14.66	branched-chain amino acid transport system II carrier protein	20	gyrB	-26.16	DNA topoisomerase (ATP-hydrolyzing) subunit B	20	N/A	-19.65	Derived by automated computational analysis using gene prediction method: Protein Homology.	20	arfB	-11.03	aminoacyl-tRNA hydrolase	20	E8M05_RS10175	-13.64	bacteriocin immunity protein
21	N/A	-13.37	Derived by automated computational analysis using gene prediction method: Protein Homology.	21	hupA	-21.29	DNA-binding protein	21	fnrA	-14.73	Crp/Fnr family transcriptional regulator	21	N/A	-12.89	Derived by automated computational analysis using gene prediction method: Protein Homology.	21	YYK_04145	-20.77	amino acid transporter amino acid-binding protein	21	EL147_RS05150	-18.28	V-type ATP synthase subunit I	21	nusA	-18.67	transcription termination/antitermination protein NusA	21	N/A	-20.07	class I SAM-dependent methyltransferase	21	purL	-11.97	phosphoribosylformylglycinamidine synthase subunit PurL	21	glyA	-14.51	serine hydroxymethyltransferase
22	insl1	-12.14	transposase	22	H354_RS15245	-22.45	PTS beta-glucoside transporter subunit EIIBCA	22	whiA	-16.21	DNA-binding protein WhiA	22	N/A	-12.81	Derived by automated computational analysis using gene prediction method: Protein Homology.	22	pyk	-19.9	pyruvate kinase	22	gdhA	-17.19	NADP-specific glutamate dehydrogenase	22	N/A	-25.51	DUF1033 domain-containing protein	22	gatC	-19.9	Asp-tRNA(Asn)/Glu-tRNA(Gln) amidotransferase subunit GatC	22	N/A	-14.23	ABC transporter ATP-binding protein	22	BN140_RS07990	-14.63	aminopeptidase P family protein
23	abc	-13.43	ABC transporter ATP-binding protein	23	xpt	-19.12	xanthine phosphoribosyltransferase	23	recG	-15.78	DNA helicase RecG	23	pgsA	-12.63	CDP-diacylglycerol--glycerol-3-phosphate 3-phosphatidyltransferase	23	H0506_RS04485	-20.16	ABC transporter permease	23	dagK	-19.48	diacylglycerol kinase	23	H0506_RS04990	-18.59	dihydroorotase	23	pcp	-13.84	pyroglutamyl-peptidase I	23	H0506_RS01880	-13.88	branched-chain amino acid ABC transporter permease	23	SPOG_02601	-14.09	gfo/Idh/MocA family oxidoreductase
24	metG	-13.19	methionine--tRNA ligase	24	is6	-18.07	IS6 family transposase	24	Gpo1	-18.78	glycerol-3-phosphate dehydrogenase/oxidase	24	H0506_RS08055	-12.99	ATP-dependent RecD-like DNA helicase	24	argR	-19.61	arginine repressor	24	H0506_RS04990	-17.81	dihydroorotase	24	groEL	-16.19	chaperonin GroEL	24	tgt	-19.27	tRNA guanosine(34) transglycosylase Tgt	24	rny	-14.01	ribonuclease Y	24	fldA	-14.05	flavodoxin
25	abc	-13.16	ABC transporter ATP-binding protein	25	manY	-19.13	PTS fructose transporter subunit IIC	25	ATSTE24	-14.06	M48 family peptidase	25	abc	-12.47	ABC transporter ATP-binding protein	25	H0506_RS04160	-20.08	aspartate aminotransferase	25	rpsN	-16.55	30S ribosomal protein S14	25	folD	-16.54	bifunctional methylenetetrahydrofolate dehydrogenase/methenyltetrahydrofolate cyclohydrolase	25	nfo	-19.94	deoxyribonuclease IV	25	nagA	-13.92	N-acetylglucosamine-6-phosphate deacetylase	25	ddl	-13.6	D-alanine--D-alanine ligase
26	cvpA	-12.96	colicin V production protein CvpA	26	xre	-18.47	XRE family transcriptional regulator	26	N/A	-18.46	Derived by automated computational analysis using gene prediction method: Protein Homology.	26	gspD	-12.26	secretion system protein	26	rfbD	-19.19	dTDP-4-dehydrorhamnose reductase	26	liang_rs07960	-15.6	Derived by automated computational analysis using gene prediction method: Protein Homology.	26	hflX	-22.35	GTPase HflX	26	ANOM_002981	-21.17	carboxymuconolactone decarboxylase family protein	26	rimI	-14	ribosomal-protein-alanine N-acetyltransferase	26	CRD1	-14.04	cardiolipin synthase
27	kdul	-13	5-dehydro-4-deoxy-D-glucuronate isomerase	27	purF	-19.64	amidophosphoribosyltransferase	27	TZ90_RS03115	-18.1	DUF2969 domain-containing protein	27	purE	-12.33	5-(carboxyamino)imidazole ribonucleotide mutase	27	EKO11_0639	-16.66	alpha-L-rhamnosidase	27	H0506_RS07645	-15.67	bacteriocin immunity protein	27	tetR/acrR	-18.46	TetR/AcrR family transcriptional regulator	27	csbD	-19.83	CsbD family protein	27	N/A	-14.37	Derived by automated computational analysis using gene prediction method: Protein Homology.	27	J3E66_RS02640	-13.86	PTS lactose/cellobiose transporter subunit IIA
28	yitT	-13.1	YitT family protein	28	cspA	-17.39	cold-shock protein	28	NG74_RS00185	-18.06	5-bromo-4-chloroindolyl phosphate hydrolysis protein	28	N/A	-12.35	Derived by automated computational analysis using gene prediction method: Protein Homology.	28	tgt	-19.02	tRNA guanosine(34) transglycosylase Tgt	28	AMM49_RS08715	-17.51	aminotransferase class V-fold PLP-dependent enzyme	28	tkt	-23.72	transketolase	28	N/A	-19.48	Derived by automated computational analysis using gene prediction method: Protein Homology.	28	dhuD	-13.89	gluconate 5-dehydrogenase	28	liang_rs11985	-14.08	flotillin
29	SPOG_02601	-12.9	gfo/Idh/MocA family oxidoreductase	29	rpmD	-19.18	50S ribosomal protein L30	29	fur4	-12.77	uracil permease	29	fabG	-12.74	3-oxoacyl-ACP reductase FabG	29	H0506_RS01760	-19.67	NCS2 family permease	29	H0506_RS07845	-19.24	Cof-type HAD-IIB family hydrolase	29	H0506_RS01325	-18.99	Snf2 family protein	29	galE	-17.17	UDP-glucose 4-epimerase GalE	29	LCAZH_RS02445	-3.88	linear amide C-N hydrolase	29	deoD	-13.8	purine-nucleoside phosphorylase
30	aroE	-13.53	shikimate dehydrogenase	30	rimJ	-21.53	N-acetyltransferase	30	ulaB	-12.65	PTS ascorbate transporter subunit IIB	30	parA	-12.25	ParA family protein	30	H0506_RS03295	-19.75	carboxymuconolactone decarboxylase family protein	30	dps	-16.53	DNA starvation/stationary phase protection protein	30	H0506_RS04800	-17.03	lipoate--protein ligase A	30	PV10_03831	-12.39	copper-translocating P-type ATPase	30	murC	-13.77	UDP-N-acetylmuramate--L-alanine ligase	30	CPF_RS02800	-12.94	CDP-alcohol phosphatidyltransferase family protein
31	cpxA	-12.99	sensor histidine kinase	31	trpD	-21.61	anthranilate phosphoribosyltransferase	31	G4D54_RS19345	-19.03	VanZ like protein RDD	31	H0506_RS05555	-12.23	alpha/beta hydrolase	31	arsR	-15.16	ArsR family transcriptional regulator	31	H0506_RS01250	-15.73	leucine--tRNA ligase	31	engB	-17.22	YihA family ribosome biogenesis GTP-binding protein	31	N/A	-17.17	Derived by automated computational analysis using gene prediction method: Protein Homology.	31	SCO7061	-13.18	MarR family transcriptional regulator	31	liang_rs02935	-13.78	ABC transporter ATP-binding protein
32	licT	-12.63	transcription antiterminator LicT	32	rimJ	-21.69	N-acetyltransferase	32	argH	-14.05	argininosuccinate lyase	32	SSUBM407_RS03540	-12.25	ZIP family metal transporter	32	glnQ	-19.36	glutamine ABC transporter ATP-binding protein GlnQ	32	lacD	-16.51	tagatose-bisphosphate aldolase	32	murG	-20.81	undecaprenyldiphospho-muramoylpentapeptide beta-N-acetylglucosaminyltransferase	32	fur4	-19.35	uracil permease	32	yvcK	-9.98	YvcK family protein	32	amiB	-13.61	N-acetylmuramoyl-L-alanine amidase
33	AL529_RS09690	-12.09	fructose-bisphosphatase class III	33	rho	-19.39	transcription termination factor Rho	33	E6A31_RS12110	-15.86	DUF624 domain-containing protein	33	LA14_RS08610	-12.12	BspA family leucine-rich repeat surface protein	33	H0506_RS02655	-19.32	class I SAM-dependent methyltransferase	33	recG	-15.19	ATP-dependent helicase	33	glyA	-14.01	serine hydroxymethyltransferase	33	N/A	-19.01	Derived by automated computational analysis using gene prediction method: Protein Homology.	33	liang_rs11195	-13.6	ring-cleaving dioxygenase	33	fusA	-13.56	elongation factor G
34	glnP	-12.6	glutamine ABC transporter permease	34	radA	-19.93	DNA repair protein RadA	34	ppaC	-12.62	manganese-dependent inorganic pyrophosphatase	34	deoB	-12.12	phosphopentomutase	34	uxaC	-19.29	glucuronate isomerase	34	H0506_RS04760	-14.81	phosphate ABC transporter substrate-binding protein	34	STND_0493	-23.88	muramidase	34	cspA	-19.37	cold-shock protein	34	CYU10_RS06870	-13.46	YlbF family regulator	34	ftsA	-13.43	cell division protein FtsA
35	abc	-12.62	ABC transporter permease	35	H0506_RS09205	-20.7	LysM peptidoglycan-binding domain-containing protein	35	N/A	-16.92	Derived by automated computational analysis using gene prediction method: Protein Homology.	35	abc	-12.11	ABC transporter ATP-binding protein	35	EL076_RS04635	-19.82	NADP-dependent oxidoreductase	35	rpsK	-17.93	30S ribosomal protein S11	35	tadA	-23.79	tRNA adenosine(34) deaminase TadA	35	N/A	-19.92	carbonic anhydrase	35	USP	-11.63	universal stress protein	35	HL854_RS25240	-13.65	PTS mannose/fructose/sorbose transporter subunit IIB
36	DQN42_RS03380	-11.58	nuclear transport factor 2 family protein	36	rpsK	-18.8	30S ribosomal protein S11	36	rplP	-14.38	50S ribosomal protein L16	36	deoC	-12.09	deoxyribose-phosphate aldolase	36	yaaT	-15.67	stage 0 sporulation protein YaaT	36	H0506_RS00360	-15.45	DNA-3-methyladenine glycosylase	36	H0506_RS01140	-16	YebC/PmpR family DNA-binding transcriptional regulator	36	parC	-18.55	DNA topoisomerase IV subunit A	36	liang_rs01280	-12.14	sugar dehydrogenase	36	MBM_07001	-13.69	mechanosensitive ion channel family protein
37	thiT	-12.53	energy-coupled thiamine transporter ThiT	37	ACP1	-18.53	acyl carrier protein	37	LCAZH_RS05040	-13.8	YebC/PmpR family DNA-binding transcriptional regulator	37	BTZ13_RS01865	-12.05	DUF488 domain-containing protein	37	H0506_RS04140	-12.35	copper-translocating P-type ATPase	37	sdaAB	-15.19	L-serine ammonia-lyase iron-sulfur-dependent subunit beta	37	AVT04_RS06400	-18.48	PTS beta-glucoside transporter subunit EIIBCA	37	N/A	-19.53	DNA-binding protein	37	liang_rs02935	-14.35	ABC transporter ATP-binding protein	37	QX69_RS08495	-13.98	sugar transferase
38	thiD	-12.55	hydroxymethylpyrimidine/phosphomethylpyrimidine kinase	38	H0506_RS05170	-17.09	GNAT family N-acetyltransferase	38	chiB	-17.39	chitinase	38	LOC111361214	-12.04	stage 0 sporulation protein YaaT	38	abc	-20.46	ABC transporter ATP-binding protein	38	N/A	-17.11	Derived by automated computational analysis using gene prediction method: Protein Homology.	38	H0506_RS01420	-17.64	metallophosphoesterase	38	N/A	-19.51	NADP-dependent oxidoreductase	38	liang_rs06970	-10.16	multidrug ABC transporter ATP-binding protein	38	N/A	-13.82	Derived by automated computational analysis using gene prediction method: Protein Homology.
39	H0506_RS04395	-12.41	rhodanese domain-containing protein	39	recG	-21.06	ATP-dependent helicase	39	tetR/acrR	-17.66	TetR/AcrR family transcriptional regulator	39	recG	-12.03	DNA helicase RecG	39	groEL	-19.18	chaperonin GroEL	39	dhaK	-16.62	dihydroxyacetone kinase subunit DhaK	39	FOB25_RS11660	-24.57	PTS system mannose/fructose/N-acetylgalactosamine-transporter subunit IIB	39	arsR	-15.66	ArsR family transcriptional regulator	39	liang_rs06970	-14.18	MutS-related protein family 1	39	liang_rs03490	-13.23	asparaginase
40	abc	-12.41	ABC transporter permease	40	H354_RS17900	-22.75	addiction module antitoxin	40	purL	-17.61	phosphoribosylformylglycinamidine synthase subunit PurL	40	H354_RS17455	-12.01	alpha-glucosidase	40	pstA	-17.26	ABC transporter permease	40	N/A	-15.31	Derived by automated computational analysis using gene prediction method: Protein Homology.	40	glmU	-26.37	N-acetyltransferase	40	N/A	-18.98	DUF448 domain-containing protein	40	SPPN_RS10130	-15.11	Cof-type HAD-IIB family hydrolase	40	liang_rs02995	-13.23	citrate:sodium symporter
41	rpsF	-12.7	30S ribosomal protein S6	41	pepV	-15.93	dipeptidase PepV	41	malG	-15.69	ABC transporter permease	41	mdcG	-11.93	malonate decarboxylase acyl carrier protein	41	nrdD	-18.37	anaerobic ribonucleoside-triphosphate reductase	41	rpoN	-16.47	RNA polymerase factor sigma-54	41	msrA	-27.15	peptide-methionine (S)-S-oxide reductase	41	LCAZH_RS02120	-19.3	PTS sugar transporter subunit IIC	41	AMM49_RS00395	-13.37	N-acetylmannosamine-6-phosphate 2-epimerase	41	N/A	-13.79	Derived by automated computational analysis using gene prediction method: Protein Homology.
42	N/A	-12.46	Derived by automated computational analysis using gene prediction method: Protein Homology.	42	H0506_RS09205	-20.82	LysM peptidoglycan-binding domain-containing protein	42	rpml	-14.28	50S ribosomal protein L35	42	H0506_RS02260	-11.98	UMP kinase	42	H0506_RS02785	-14.52	oxidoreductase	42	N/A	-16.6	Derived by automated computational analysis using gene prediction method: Protein Homology.	42	ogt	-20.72	methylated-DNA--protein-cysteine methyltransferase	42	manX	-14.44	PTS mannose transporter subunit IIAB	42	glnA	-11.72	type I glutamate--ammonia ligase	42	SCO7061	-14.26	MarR family transcriptional regulator
43	N/A	-12.28	Derived by automated computational analysis using gene prediction method: Protein Homology.	43	rpsP	-19.24	30S ribosomal protein S16	43	fis	-16.97	DNA-binding response regulator	43	rplD	-11.95	50S ribosomal protein L4	43	copZ	-20.37	copper chaperone	43	H0506_RS07920	-15.43	Asp23/Gls24 family envelope stress response protein	43	tgt	-20.25	tRNA guanosine(34) transglycosylase Tgt	43	glnA	-18.87	type I glutamate--ammonia ligase	43	H354_RS17455	-12	alpha-glucosidase	43	BBDE_RS00755	-12.48	alpha-L-rhamnosidase
44	H0506_RS09210	-12.21	energy-coupling factor transporter transmembrane protein EcfT	44	secE	-19.3	preprotein translocase subunit SecE	44	celB	-17.02	PTS system cellobiose-specific IIC component	44	N/A	-11.95	Derived by automated computational analysis using gene prediction method: GeneMarkS+.	44	H0506_RS05580	-18.23	polyprenyl synthetase family protein	44	N/A	-16.6	Derived by automated computational analysis using gene prediction method: Protein Homology.	44	argG	-23.83	argininosuccinate synthetase	44	groEL	-18.78	chaperonin GroEL	44	liang_rs00690	-12.43	glyoxalase	44	rpsN	-10.7	30S ribosomal protein S14
45	recU	-12.18	Holliday junction resolvase RecU	45	asd	-21.58	aspartate-semialdehyde dehydrogenase	45	rpsJ	-12.29	30S ribosomal protein S10	45	abc	-11.9	ABC transporter ATP-binding protein	45	H0506_RS06670	-18.99	glycosyltransferase family 2 protein	45	rsmA	-15.44	16S rRNA (adenine(1518)-N(6)/adenine(1519)-N(6))- dimethyltransferase RsmA	45	dusB	-15.67	tRNA dihydrouridine synthase DusB	45	uxaC	-18.77	glucuronate isomerase	45	tsf	-9.99	elongation factor Ts	45	TVAG_031980	-13.32	flavodoxin family protein
46	H0506_RS01875	-12.65	ABC transporter substrate-binding protein	46	H0506_RS09210	-20.75	energy-coupling factor transporter transmembrane protein EcfT	46	galR	-19.34	galactose operon repressor galR	46	nhaC	-11.64	Na+/H+ antiporter NhaC	46	H0506_RS08885	-19.12	adenylosuccinate synthase	46	H0506_RS05580	-16.69	polyprenyl synthetase family protein	46	H0506_RS07265	-17.71	nucleoid-associated protein YbaB/EbfC family	46	relA	-14.67	GTP pyrophosphokinase	46	cobB	-9.89	NAD-dependent protein deacylase	46	cysE	-13.11	serine O-acetyltransferase
47	N/A	-10.72	Derived by automated computational analysis using gene prediction method: Protein Homology.	47	H0506_RS04825	-15.83	LacI family transcriptional regulator	47	abc	-12.12	ABC transporter ATP-binding protein	47	H354_RS15245	-11.85	PTS beta-glucoside transporter subunit EIIBCA	47	pcp	-13.52	pyroglutamyl-peptidase I	47	codY	-14.05	transcriptional regulator	47	purC	-13.83	phosphoribosylaminoimidazole-succinocarboxamide synthase	47	trpC	-18.69	indole-3-glycerol phosphate synthase TrpC	47	liang_rs08480	-7.03	alpha-mannosidase	47	MFS	-13.59	MFS transporter
48	sppA	-12.14	signal peptide peptidase SppA	48	H0506_RS07985	-18.72	30S ribosomal protein S18	48	rpmC	-13.45	50S ribosomal protein L29	48	H0506_RS01585	-11.9	MFS transporter	48	glmM	-17.86	phosphoglucosamine mutase	48	cysE	-14.04	serine O-acetyltransferase	48	H0506_RS01735	-21.47	PTS mannose family transporter subunit IID	48	ami	-19.3	N-acetylmuramoyl-L-alanine amidase	48	rnmV	-13.25	ribonuclease M5	48	recA	-13.03	recombinase RecA
49	opuCC	-12.14	osmoprotectant ABC transporter substrate-binding protein	49	H0506_RS03375	-20.11	HPr kinase/phosphorylase	49	oppA	-14.13	oligopeptide ABC transporter substrate-binding protein	49	gatC	-11.95	Asp-tRNA(Asn)/Glu-tRNA(Gln) amidotransferase subunit GatC	49	nfo	-18.82	deoxyribonuclease IV	49	murG	-14.35	undecaprenyldiphospho-muramoylpentapeptide beta-N-acetylglucosaminyltransferase	49	H0506_RS03820	-21.09	calcium-translocating P-type ATPase PMCA-type	49	BBDE_RS00755	-16.06	alpha-L-rhamnosidase	49	gltS	-13	sodium:glutamate symporter	49	BN140_RS04795	-12.93	DNA repair exonuclease
50	H0506_RS06605	-12.11	NAD kinase	50	lytC	-21.32	autolysin	50	CPC231_RS01695	-15.65	TIGR03943 family protein	50	N/A	-11.85	DUF965 domain-containing protein	50	liang_rs13545	-15.65	Derived by automated computational analysis using gene prediction method: Protein Homology.	50	DYD51_RS04950	-16.44	formate nitrite transporter family protein	50	pyrF	-16.14	orotidine-5'-phosphate decarboxylase	50	rimJ	-9.12	N-acetyltransferase	50	liang_rs08230	-12.97	copper chaperone	50	liang_rs05175	-12.81	NAD(P)H-hydrate dehydratase
51	H0506_RS03390	-12.01	YtxH domain-containing protein	51	csbD	-18.58	CsbD family protein	51	crp	-17.06	transcriptional regulator	51	mraY	-11.79	phospho-N-acetylmuramoyl-pentapeptide- transferase	51	H0506_RS07570	-18.46	carbonic anhydrase	51	H0506_RS03470	-16.91	histidine phosphatase family protein	51	H0506_RS00215	-17.47	pyridoxal phosphate-dependent aminotransferase	51	PF3D7_1416500	-17.04	NADP-specific glutamate dehydrogenase	51	abc	-11.9	ABC transporter ATP-binding protein	51	N/A	-14.8	Derived by automated computational analysis using gene prediction method: Protein Homology.
52	SMAR_RS05210	-11.93	DUF975 domain-containing protein	52	H354_RS21075	-21.55	tagatose-6-phosphate kinase	52	abc	-12.89	ABC transporter permease	52	E3C75_RS09370	-11.78	PTS sugar transporter subunit IIC	52	amiD2	-19.19	N-acetylmuramoyl-L-alanine amidase	52	DQN23_RS04660	-15.06	ZIP family metal transporter	52	folA	-16.08	dihydrofolate reductase	52	N/A	-18.42	Derived by automated computational analysis using gene prediction method: Protein Homology.	52	N/A	-11.92	Derived by automated computational analysis using gene prediction method: Protein Homology.	52	A966_RS10170	-12.55	polysaccharide biosynthesis protein
53	vanY	-12.46	D-Ala-D-Ala carboxypeptidase VanY	53	guaA	-20.23	glutamine-hydrolyzing GMP synthase	53	rplT	-13.66	50S ribosomal protein L20	53	H0506_RS04990	-11.73	dihydroorotase	53	E6A31_RS10020	-18.68	iron-sulfur cluster biosynthesis family protein	53	H0506_RS06520	-15.15	GntR family transcriptional regulator	53	EL076_RS08145	-17.51	NAD-dependent malic enzyme	53	rluA	-10.78	rRNA pseudouridine synthase	53	N/A	-9.61	Derived by automated computational analysis using gene prediction method: Protein Homology.	53	SCO7061	-12.87	MarR family transcriptional regulator
54	relA	-11.94	GTP pyrophosphokinase	54	rplM	-17.85	50S ribosomal protein L13	54	metQ	-16.28	methionine ABC transporter substrate-binding protein	54	engB	-11.51	YihA family ribosome biogenesis GTP-binding protein	54	cbiO	-18.54	energy-coupling factor ABC transporter ATP-binding protein	54	mngB	-15.37	alpha-mannosidase	54	N/A	-11.32	DUF4809 domain-containing protein	54	CPF_RS05220	-18.47	GNAT family N-acetyltransferase	54	N/A	-12.8	lipoprotein YaeC family	54	KN10_RS00460	-12.56	LTA synthase family protein
55	N/A	-11.94	Derived by automated computational analysis using gene prediction method: Protein Homology.	55	asnS	-18.03	asparagine--tRNA ligase	55	N/A	-15.8	Derived by automated computational analysis using gene prediction method: Protein Homology.	55	H0506_RS01140	-11.74	YebC/PmpR family DNA-binding transcriptional regulator	55	gap	-15.3	type I glyceraldehyde-3-phosphate dehydrogenase	55	mdxK	-14.76	maltose phosphorylase	55	H0506_RS01375	-10.48	HD domain-containing protein	55	malG	-18.25	ABC transporter permease	55	atpB	-10.85	F0F1 ATP synthase subunit A	55	N/A	-13.47	Derived by automated computational analysis using gene prediction method: GeneMarkS+.
56	xerC	-12.12	tyrosine recombinase XerC	56	N/A	-18.47	Derived by automated computational analysis using gene prediction method: Protein Homology.	56	uspA	-16.29	universal stress protein	56	cbiO	-11.55	energy-coupling factor ABC transporter ATP-binding protein	56	abc	-18.5	ABC transporter ATP-binding protein	56	H0506_RS04140	-18.96	copper-translocating P-type ATPase	56	DQN56_RS08205	-17.52	sigma-54-dependent transcriptional regulator	56	N/A	-15.45	oxidoreductase	56	rpsK	-9.81	30S ribosomal protein S11	56	thrS	-12.51	threonine--tRNA ligase
57	N/A	-13.06	Derived by automated computational analysis using gene prediction method: Protein Homology.	57	SCAB_RS11985	-16.12	DUF448 domain-containing protein	57	abc	-12.27	ABC transporter ATP-binding protein	57	H0506_RS07860	-11.56	alanine racemase	57	H0506_RS05545	-18.78	DNA-binding protein	57	abc	-17.75	ABC transporter ATP-binding protein	57	DYD51_RS02645	-19.46	DUF2829 domain-containing protein	57	ybeY	-17.12	rRNA maturation RNase YbeY	57	pstS	-12.11	phosphate ABC transporter substrate-binding protein	57	cspA	-12.5	cold-shock protein
58	N/A	-11.06	Derived by automated computational analysis using gene prediction method: Protein Homology.	58	H354_RS15235	-20.01	TVP38/TMEM64 family protein	58	intA	-17.68	integrase	58	celB	-11.67	cellobiose phosphotransferase system IIB component	58	gatC	-18.37	Asp-tRNA(Asn)/Glu-tRNA(Gln) amidotransferase subunit GatC	58	H0506_RS04140	-13.19	glycerol kinase	58	N/A	-17.36	Derived by automated computational analysis using gene prediction method: Protein Homology.	58	malF	-14.11	ABC transporter permease	58	udkB	-11.75	uridine kinase	58	yaaA	-12.76	S4 domain-containing protein YaaA
59	abc	-12.39	ABC transporter ATP-binding protein	59	degV	-14.72	DegV family protein	59	gpmA	-16.16	2,3-bisphosphoglycerate-dependent phosphoglycerate mutase	59	gntR	-11.52	GntR family transcriptional regulator	59	vicK	-18.32	sensor histidine kinase	59	N/A	-15.11	Derived by automated computational analysis using gene prediction method: Protein Homology.	59	H0506_RS01170	-14.75	ABC transporter	59	N/A	-18.05	ABC transporter ATP-binding protein	59	rph	-13.87	ribonuclease PH	59	N/A	-12.35	Derived by automated computational analysis using gene prediction method: Protein Homology.
60	recO	-11.76	DNA repair protein RecO	60	SPR_RS01320	-18.88	type II toxin-antitoxin system antitoxin RelB/DinJ family	60	E5165_RS08045	-14.62	heavy metal translocating P-type ATPase	60	E3C75_RS08935	-11.42	class A sortase	60	E3C75_RS09370	-18.72	PTS sugar transporter subunit IIC	60	N/A	-14.76	Derived by automated computational analysis using gene prediction method: Protein Homology.	60	eno	-18.3	enolase	60	N/A	-18.06	aminopeptidase P family protein	60	lmo2801	-7.76	N-acetylmannosamine-6-phosphate 2-epimerase	60	liang_rs05905	-11.29	ABC transporter ATP-binding protein
61	pepF	-8.68	oligoendopeptidase F	61	zupT	-19.89	divalent metal cation transporter	61	J7624_RS03275	-12.46	ATPase AAA family	61	H0506_RS00235	-12.28	phosphoribosylaminoimidazolesuccinocarboxamide synthase	61	N/A	-12.67	Derived by automated computational analysis using gene prediction method: Protein Homology.	61	H0506_RS01375	-15.61	HD domain-containing protein	61	H0506_RS07845	-14.64	Cof-type HAD-IIB family hydrolase	61	gpmB	-14.5	2,3-diphosphoglycerate-dependent phosphoglycerate mutase GpmB	61	cel1b	-12.45	glycoside hydrolase family 1 protein	61	N/A	-12.52	Derived by automated computational analysis using gene prediction method: Protein Homology.
62	N/A	-11.71	Derived by automated computational analysis using gene prediction method: Protein Homology.	62	abc	-17.95	ABC transporter permease	62	pgk	-11.69	phosphoglycerate kinase	62	SR187_RS04475	-11.55	DUF1430 domain-containing protein	62	N/A	-18.24	Derived by automated computational analysis using gene prediction method: Protein Homology.	62	DQN42_RS07405	-15.82	cupin domain-containing protein	62	H0506_RS03620	-15.69	transcriptional repressor	62	rsmG	-18.04	16S rRNA (guanine(527)-N(7))-methyltransferase RsmG	62	oppA	-11.8	ABC transporter substrate-binding protein	62	liang_rs08630	-12.63	ABC transporter ATP-binding protein
63	abc	-10.85	ABC transporter ATP-binding protein	63	N/A	-19.72	Derived by automated computational analysis using gene prediction method: Protein Homology.	63	STM2570	-15.78	PTS sugar transporter subunit IIC	63	yncB	-12.53	NADP-dependent oxidoreductase	63	N/A	-19.83	Derived by automated computational analysis using gene prediction method: Protein Homology.	63	nrnA	-18.29	bifunctional oligoribonuclease/PAP phosphatase NrnA	63	DQM67_RS08945	-21.82	alpha-mannosidase	63	cysK	-19.92	cysteine synthase A	63	liang_rs00675	-12.42	RNA-binding transcriptional accessory protein	63	nifJ	-13.01	pyruvate:ferredoxin (flavodoxin) oxidoreductase
64	TARDBP	-11.92	DNA-binding protein	64	N/A	-19.72	Derived by automated computational analysis using gene prediction method: Protein Homology.	64	celC	-15.81	PTS cellobiose transporter subunit IIA	64	adk	-11.42	adenylate kinase	64	manX	-14.48	PTS mannose transporter subunit IIAB	64	H0506_RS04485	-15.28	ABC transporter permease	64	ascB	-21.9	6-phospho-beta-glucosidase	64	SPPN_RS09835	-14.45	cellobiose phosphotransferase system IIB component	64	fhuC	-12.56	iron ABC transporter permease	64	glnQ	-13.65	amino acid ABC transporter ATP-binding protein
65	H0506_RS05170	-11.65	GNAT family acetyltransferase	65	ychF	-16.4	redox-regulated ATPase YchF	65	H354_RS15290	-16.33	serine/threonine protein phosphatase	65	H0506_RS01585	-12.32	MFS transporter	65	H0506_RS00480	-16.4	NAD(P)-dependent oxidoreductase	65	ftsL	-15.09	cell division protein FtsL	65	ftsE	-15.67	cell division ATP-binding protein FtsE	65	MBM_08722	-18.16	cupin domain-containing protein	65	pfkB	-12.34	1-phosphofructokinase	65	N/A	-12.54	Derived by automated computational analysis using gene prediction method: Protein Homology.
66	N/A	-11.61	Derived by automated computational analysis using gene prediction method: Protein Homology.	66	H0506_RS04965	-19.68	dihydrolipoamide acetyltransferase	66	bglB	-11.85	6-phospho-beta-glucosidase	66	yidC	-11.31	protein translocase component YidC	66	H0506_RS00935	-13.15	D-tyrosyl-tRNA(Tyr) deacylase	66	xth	-16.92	exodeoxyribonuclease III	66	H0506_RS09095	-17.69	DUF2273 domain-containing protein	66	LPD1	-13.6	dihydrolipoyl dehydrogenase	66	livH	-12.38	branched-chain amino acid ABC transporter permease	66	mreD	-11.95	rod shape-determining protein MreD
67	H0506_RS03635	-11.58	sugar kinase	67	H0506_RS06205	-22.27	alpha/beta hydrolase	67	N/A	-11.35	Derived by automated computational analysis using gene prediction method: Protein Homology.	67	E3C75_RS05990	-11.24	holin	67	H0506_RS06610	-14.72	GTP pyrophosphokinase	67	EL147_RS10005	-15.91	NAD dependent epimerase/dehydratase	67	LOC111129917	-14.86	N(4)-(beta-N-acetylglucosaminyl)-L-asparaginase	67	ADE12	-18.09	adenylosuccinate synthase	67	H0506_RS05560	-10.83	DegV family protein	67	priA	-12.51	primosomal protein N'
68	pppA	-11.6	serine/threonine-protein phosphatase	68	guaB	-16.91	IMP dehydrogenase	68	rimP	-15.27	ribosome maturation factor RimP	68	H0506_RS04800	-11.37	lipoate--protein ligase A	68	N/A	-17.97	Derived by automated computational analysis using gene prediction method: Protein Homology.	68	H0506_RS03650	-15.84	UDP-N-acetylmuramoyl-L-alanine--D-glutamate ligase	68	rsmH	-12.99	16S rRNA (cytosine(1402)-N(4))-methyltransferase RsmH	68	H0506_RS03910	-17.1	phospho-sugar mutase	68	N/A	-7.46	Derived by automated computational analysis using gene prediction method: Protein Homology.	68	GLRG_03543	-11.67	RluA family pseudouridine synthase
69	N/A	-11.51	Derived by automated computational analysis using gene prediction method: Protein Homology.	69	DYD51_RS08825	-19.57	PTS maltose transporter subunit IICB	69	N/A	-13.28	Derived by automated computational analysis using gene prediction method: Protein Homology.	69	H0506_RS01660	-11.47	TrkA family potassium uptake protein	69	H0506_RS05745	-14.65	phosphoglucosamine mutase	69	H354_RS19310	-14.04	bifunctional 2-keto-4-hydroxyglutarate aldolase/2-keto-3-deoxy-6-phosphogluconate aldolase	69	H0506_RS06175	-17.56	CsbD family protein	69	LOC112902052	-17.93	50S ribosomal protein L19	69	mraY	-12.28	phospho-N-acetylmuramoyl-pentapeptide- transferase	69	D1866_RS02755	-11.54	integrase
70	MAA_06814	-11.47	DUF1033 domain-containing protein	70	H0506_RS06450	-17.39	DNA-binding response regulator	70	Y1U_C1427	-15.57	glyoxalase	70	H0506_RS02915	-11.82	dihydrofolate reductase	70	N/A	-15.92	Derived by automated computational analysis using gene prediction method: Protein Homology.	70	CLOST_RS02105	-15.97	DUF975 domain-containing protein	70	H0506_RS04620	-15.12	orotate phosphoribosyltransferase	70	N/A	-17.77	Derived by automated computational analysis using gene prediction method: Protein Homology.	70	liang_rs11895	-8.82	pyridoxal phosphate-dependent aminotransferase	70	cysK	-12.77	cysteine synthase A
71	vanZ	-11.57	VanZ family protein	71	H0506_RS06250	-17.82	DUF1846 domain-containing protein	71	rodA	-15.05	FtsW/RodA/SpoVE family cell cycle protein	71	snf2	-11.32	Snf2 family protein	71	ybeY	-16.53	rRNA maturation RNase YbeY	71	N/A	-7.47	Derived by automated computational analysis using gene prediction method: Protein Homology.	71	fabF	-17.27	beta-ketoacyl-[acyl-carrier-protein] synthase II	71	BN5_RS19570	-17.71	class I SAM-dependent methyltransferase	71	rplV	-9.75	50S ribosomal protein L22	71	DYE31_RS05030	-12.24	general stress protein
72	H0506_RS00470	-12.1	GlsB/YeaQ/YmgE family stress response membrane protein	72	N/A	-15.17	Derived by automated computational analysis using gene prediction method: Protein Homology.	72	abc	-17.69	ABC transporter ATP-binding protein	72	rcsB	-11.25	DNA-binding response regulator	72	galE	-16.71	UDP-glucose 4-epimerase GalE	72	H0506_RS06665	-15.86	ABC transporter	72	CPF_RS01995	-13.93	bifunctional 2-keto-4-hydroxyglutarate aldolase/2-keto-3-deoxy-6-phosphogluconate aldolase	72	N/A	-13.05	D-tyrosyl-tRNA(Tyr) deacylase	72	asnS	-12.12	asparagine--tRNA ligase	72	hslV	-12.38	ATP-dependent protease subunit HslV
73	H0506_RS07515	-11.48	PDZ domain-containing protein	73	H0506_RS06610	-19.36	GTP pyrophosphokinase	73	gnd	-12.16	phosphogluconate dehydrogenase (NADP(+)-dependent decarboxylating)	73	H0506_RS01115	-11.08	metal ABC transporter permease	73	H0506_RS07120	-17.33	magnesium transporter	73	rimM	-14.62	ribosome maturation factor RimM	73	H0506_RS00510	-13.39	elongation factor Ts	73	N/A	-16.04	NAD(P)-dependent oxidoreductase	73	H0506_RS01235	-11.79	HAD family phosphatase	73	N/A	-12.49	Derived by automated computational analysis using gene prediction method: Protein Homology.
74	abc	-11.84	ABC transporter ATP-binding protein	74	infC	-17.89	translation initiation factor IF-3	74	lgt	-9.78	prolipoprotein diacylglyceryl transferase	74	H0506_RS09015	-11.13	YitT family protein	74	H0506_RS01760	-17.83	uracil permease	74	H0506_RS04620	-14.43	orotate phosphoribosyltransferase	74	fabZ	-20.65	3-hydroxyacyl-[acyl-carrier-protein] dehydratase FabZ	74	fabD	-11.02	[acyl-carrier-protein] S-malonyltransferase	74	H0506_RS06520	-12.22	GntR family transcriptional regulator	74	malP	-14.32	maltose phosphorylase
75	H0506_RS05000	-11.46	cation transporter	75	H0506_RS01425	-13.21	CBS domain-containing protein	75	abc	-13.66	ABC transporter ATP-binding protein	75	liang_rs00125	-11.39	Derived by automated computational analysis using gene prediction method: Protein Homology.	75	H0506_RS02915	-20.31	dihydrofolate reductase	75	kdul	-14.58	5-dehydro-4-deoxy-D-glucuronate isomerase	75	tuf	-22.24	elongation factor Tu	75	CYU10_RS07065	-15.35	stage 0 sporulation protein YaaT	75	N/A	-9.96	Derived by automated computational analysis using gene prediction method: Protein Homology.	75	CPF_RS01055	-11.29	exonuclease sbcCD subunit D
76	EL147_RS01985	-11.46	TIGR00159 family protein	76	H0506_RS05195	-19.24	(d)CMP kinase	76	SR187_RS04910	-13.8	phosphoglucomutase/phosphomannomutase	76	H0506_RS06185	-11.2	amino acid permease	76	N/A	-18.02	Derived by automated computational analysis using gene prediction method: Protein Homology.	76	grpE	-16.68	nucleotide exchange factor GrpE	76	purL	-10.34	phosphoribosylformylglycinamidine synthase subunit PurL	76	N/A	-14.99	LysM peptidoglycan-binding domain-containing protein	76	liang_rs01655	-9.3	LTA synthase family protein	76	CPF_RS02835	-12.08	AI-2E family transporter
77	purR	-10.76	pur operon repressor	77	nadA	-17.16	quinolinate synthase NadA	77	rplE	-15.51	50S ribosomal protein L5	77	H0506_RS01250	-11.15	leucine--tRNA ligase	77	H0506_RS00205	-14.32	ribose-phosphate diphosphokinase	77	agaS	-15.21	SIS domain-containing protein	77	aspS	-16.11	aspartate--tRNA ligase	77	ccpA	-17.45	catabolite control protein A	77	glmU	-10.04	bifunctional N-acetylglucosamine-1-phosphate uridyltransferase/glucosamine-1-phosphate acetyltransferase	77	gpt	-12.15	xanthine phosphoribosyltransferase
78	manX	-12.07	PTS sugar transporter subunit IIB	78	glmU	-19.2	N-acetyltransferase	78	MAC_04072	-12.35	muramidase	78	ulaD	-10.97	3-dehydro-L-gulonate-6-phosphate decarboxylase UlaD	78	DQN42_RS07405	-18.13	cupin domain-containing protein	78	abc	-15.61	ABC transporter ATP-binding protein	78	JH06_2480	-24	N-acetylmannosamine-6-phosphate 2-epimerase	78	N/A	-17.45	Derived by automated computational analysis using gene prediction method: Protein Homology.	78	N/A	-10.16	Derived by automated computational analysis using gene prediction method: Protein Homology.	78	N/A	-12.29	Derived by automated computational analysis using gene prediction method: Protein Homology.
79	fmt	-11.35	methionyl-tRNA formyltransferase	79	H0506_RS08180	-19.17	ribulose-phosphate 3-epimerase	79	LILO_RS10605	-15.4	DUF1048 domain-containing protein	79	fetB	-11	iron ABC transporter permease	79	N/A	-17.98	Derived by automated computational analysis using gene prediction method: Protein Homology.	79	E3C75_RS10650	-13.43	family 2 glycosyl transferase	79	queA	-20.36	tRNA preQ1(34) S-adenosylmethionine ribosyltransferase-isomerase QueA	79	gap	-16.83	type I glyceraldehyde-3-phosphate dehydrogenase	79	dacA	-11.33	D-alanyl-D-alanine carboxypeptidase	79	STM4104	-12.25	multifunctional 2' 3'-cyclic-nucleotide 2'-phosphodiesterase/5'-nucleotidase/3'-nucleotidase
80	STH8232_RS04575	-11.43	aminotransferase class V-fold PLP-dependent enzyme	80	H0506_RS00235	-18.86	phosphoribosylaminoimidazolesuccinocarboxamide synthase	80	SCO0138	-15.35	short-chain dehydrogenase/reductase	80	H0506_RS08470	-11.08	CPBP family intramembrane metalloprotease	80	gatB	-15.62	PTS galactitol transporter subunit IIB	80	adcA	-12.43	zinc ABC transporter substrate-binding protein AdcA	80	H0506_RS08555	-10.08	tyrosine--tRNA ligase	80	gatB	-15.81	PTS galactitol transporter subunit IIB	80	gloA	-12.32	glyoxalase	80	amaP	-12.54	alkaline shock response membrane anchor protein AmaP
81	H0506_RS05720	-11.37	FAD-binding protein	81	H0506_RS00480	-19.09	NAD(P)-dependent oxidoreductase	81	H0506_RS01760	-11.99	NCS2 family permease	81	N/A	-11.16	Derived by automated computational analysis using gene prediction method: GeneMarkS+.	81	H0506_RS02460	-15.69	F0F1 ATP synthase subunit alpha	81	A0G_RS00575	-14.56	DUF1722 domain-containing protein	81	A361_RS08720	-19.18	DUF1797 domain-containing protein	81	N/A	-17.27	Derived by automated computational analysis using gene prediction method: Protein Homology.	81	ohyA	-12.1	oleate hydratase	81	N/A	-12.11	Derived by automated computational analysis using gene prediction method: Protein Homology.
82	H0506_RS03655	-12.21	undecaprenyldiphospho-muramoylpentapeptide beta-N-acetylglucosaminyltransferase	82	H0506_RS00865	-19.11	sigma-70 family RNA polymerase sigma factor	82	N/A	-14.48	Derived by automated computational analysis using gene prediction method: Protein Homology.	82	H354_RS12965	-11.03	haloacid dehalogenase	82	H0506_RS04130	-17.8	cold-shock protein	82	N/A	-17.3	Derived by automated computational analysis using gene prediction method: Protein Homology.	82	H0506_RS07875	-16.71	3-deoxy-7-phosphoheptulonate synthase	82	N/A	-15.24	bacteriocin	82	liang_rs01495	-8.94	DUF910 domain-containing protein	82	YNK1	-12.21	nucleoside-diphosphate kinase
83	H0506_RS07300	-11.38	NAD(P)/FAD-dependent oxidoreductase	83	cvfB	-18.42	RNA-binding protein S1	83	N/A	-12.76	Derived by automated computational analysis using gene prediction method: Protein Homology.	83	cca	-11.03	CCA tRNA nucleotidyltransferase	83	gdhA	-16	NADP-specific glutamate dehydrogenase	83	H0506_RS03140	-15.08	dephospho-CoA kinase	83	H0506_RS08880	-21.48	low molecular weight phosphotyrosine protein phosphatase	83	N/A	-13.11	signal recognition particle-docking protein FtsY	83	rpoB	-12.42	DNA-directed RNA polymerase subunit beta	83	cadA	-11.98	cadmium-translocating P-type ATPase
84	liang_rs06260	-12.7	Derived by automated computational analysis using gene prediction method: GeneMarkS+.	84	H0506_RS04750	-19.13	inositol monophosphatase	84	ulaD	-15.14	3-dehydro-L-gulonate-6-phosphate decarboxylase UlaD	84	DQN42_RS07405	-11.04	cupin domain-containing protein	84	yhbY	-17.71	ribosome assembly RNA-binding protein YhbY	84	N/A	-15.21	Derived by automated computational analysis using gene prediction method: Protein Homology.	84	H0506_RS04485	-19.02	ABC transporter permease	84	LA14_RS09350	-17.92	DUF871 domain-containing protein	84	tsaC	-9.56	threonylcarbamoyl-AMP synthase	84	STK_RS12300	-12.24	phosphatase PAP2 family protein
85	rsmD	-11.25	16S rRNA (guanine(966)-N(2))-methyltransferase RsmD	85	murA	-15.67	UDP-N-acetylglucosamine 1-carboxyvinyltransferase	85	mraZ	-13.2	transcriptional regulator MraZ	85	N/A	-10.95	DUF972 domain-containing protein	85	DQN42_RS03305	-17.67	DUF624 domain-containing protein	85	H354_RS20970	-15.93	DUF368 domain-containing protein	85	rimP	-15.92	ribosome maturation factor RimP	85	SPSF3K_RS06725	-18.84	DUF697 domain-containing protein	85	galR	-10.68	GalR protein	85	lepB	-12	signal peptidase I
86	N/A	-11.9	Derived by automated computational analysis using gene prediction method: Protein Homology.	86	rpmG	-15.7	50S ribosomal protein L33	86	H0506_RS07510	-9.7	TIGR01212 family radical SAM protein	86	dnaQ	-10.98	DNA polymerase III subunit epsilon	86	H0506_RS04485	-17.64	ABC transporter permease	86	N/A	-13.76	Derived by automated computational analysis using gene prediction method: Protein Homology.	86	H0506_RS03030	-14.06	NUDIX hydrolase	86	EL076_RS08480	-13.72	ROK family protein	86	N/A	-11.36	Derived by automated computational analysis using gene prediction method: Protein Homology.	86	BLT61_RS20450	-12.05	class I SAM-dependent methyltransferase
87	H0506_RS06350	-11.03	PTS transporter subunit IIA	87	AVT04_RS06400	-14.54	PTS beta-glucoside transporter subunit EIIBCA	87	yaeC	-15.17	lipoprotein YaeC family	87	yhbY	-10.97	ribosome assembly RNA-binding protein YhbY	87	H354_RS12575	-17.72	amino acid ABC transporter permease	87	H0506_RS03595	-14.83	DNA polymerase III subunit delta	87	H0506_RS07740	-19.18	phospho-N-acetylmuramoyl-pentapeptide- transferase	87	tadA	-17.03	tRNA adenosine(34) deaminase TadA	87	Ass	-12.03	argininosuccinate synthase	87	dapD	-11.41	2 3 4 5-tetrahydropyridine-2 6-dicarboxylate N-acetyltransferase
88	H0506_RS05195	-11.2	(d)CMP kinase	88	abc	-20.09	ABC transporter permease	88	melA	-15.25	alpha-galactosidase	88	N/A	-10.96	Derived by automated computational analysis using gene prediction method: Protein Homology.	88	N/A	-16.68	Derived by automated computational analysis using gene prediction method: Protein Homology.	88	EL147_RS06970	-15.87	dihydrodipicolinate synthase family protein	88	htrA	-16.5	Serine protease DegP HtrA do-like protein	88	CMU_017570	-15.98	polyprenyl synthetase family protein	88	oxaA	-12.02	OxaA precursor	88	E6A31_RS12045	-11.96	rhamnogalacturonan acetylesterase
89	LILO_RS10605	-11.18	DUF1048 domain-containing protein	89	metG	-16.5	methionine--tRNA ligase	89	DQN42_RS02725	-13.04	cold-shock protein	89	dtd	-10.99	deacylase	89	parC	-17.44	DNA topoisomerase IV subunit A	89	gatB	-18.32	PTS galactitol transporter subunit IIB	89	thil	-22.28	tRNA 4-thiouridine(8) synthase ThiI	89	N/A	-15.57	bifunctional methylenetetrahydrofolate dehydrogenase/methenyltetrahydrofolate cyclohydrolase	89	mdcC	-11.49	malonate decarboxylase acyl carrier protein	89	galE	-12.44	UDP-glucose 4-epimerase GalE
90	plsY	-11.55	glycerol-3-phosphate 1-O-acyltransferase PlsY	90	tsf	-18.82	elongation factor Ts	90	N/A	-13.55	Derived by automated computational analysis using gene prediction method: Protein Homology.	90	RB16p192	-11	Mob-like protein	90	H0506_RS03910	-17.05	phospho-sugar mutase	90	abc	-13.92	ABC transporter ATP-binding protein	90	leuS	-18.41	leucine--tRNA ligase	90	N/A	-16.97	sensor histidine kinase	90	trpB	-11.98	tryptophan synthase subunit beta	90	liang_rs07595	-12.62	acyl-CoA thioesterase
91	ctpA	-11.19	cation transporter E1-E2 family ATPase	91	EL147_RS03870	-19.15	antibiotic biosynthesis monooxygenase	91	LEGAS_RS02080	-11.22	DUF956 domain-containing protein	91	N/A	-10.77	Derived by automated computational analysis using gene prediction method: Protein Homology.	91	tadA	-18.23	tRNA adenosine(34) deaminase TadA	91	DHT93_RS04995	-14.59	DUF1189 domain-containing protein	91	H0506_RS02900	-14.01	hydroxymethylglutaryl-CoA reductase degradative	91	CPF_RS05220	-16.95	GNAT family N-acetyltransferase	91	natA	-9.26	sodium ABC transporter ATP-binding protein	91	liang_rs02760	-11.93	peptidase M20
92	ebgA	-11.16	beta-galactosidase small subunit	92	mraZ	-16.45	transcriptional regulator MraZ	92	N/A	-15.07	Derived by automated computational analysis using gene prediction method: Protein Homology.	92	vanY	-10.96	D-Ala-D-Ala carboxypeptidase VanY	92	DQN42_RS00490	-18.6	DUF871 domain-containing protein	92	H0506_RS01585	-14.12	MFS transporter	92	pyrH	-14.91	UDP kinase	92	CPF_RS11965	-17.02	F0F1 ATP synthase subunit alpha	92	tpiA	-12.29	triose-phosphate isomerase	92	liang_rs12800	-11.5	VanZ like protein RDD
93	H0506_RS07190	-11.14	D-alanine--D-alanine ligase	93	DYD51_RS02470	-18.97	DUF2129 domain-containing protein	93	fabZ	-15.12	3-hydroxyacyl-[acyl-carrier-protein] dehydratase FabZ	93	H354_RS21785	-10.9	PTS ascorbate transporter subunit IIC	93	E3C75_RS05770	-16.03	ImmA/IrrE family metallo-endopeptidase	93	LOC11405423	-14.13	MutS2 family protein	93	amiD2	-17.31	N-acetylmuramoyl-L-alanine amidase	93	N/A	-16.4	Derived by automated computational analysis using gene prediction method: Protein Homology.	93	fabD	-10.46	[acyl-carrier-protein] S-malonyltransferase	93	adcA	-11.86	zinc ABC transporter substrate-binding protein AdcA
94	pheT	-10.86	phenylalanine--tRNA ligase subunit beta	94	dnal	-18.64	primosomal protein DnaI	94	H0506_RS06665	-15.03	carbohydrate ABC transporter permease	94	H0506_RS06225	-10.9	aldo/keto reductase	94	H0506_RS00880	-17.36	DNA-directed RNA polymerase subunit delta	94	H0506_RS09205	-14.46	LysM peptidoglycan-binding domain-containing protein	94	rplD	-16.36	50S ribosomal protein L4	94	N/A	-13.38	phosphopantothenoylcysteine decarboxylase	94	liang_rs10530	-12.75	ABC transporter ATP-binding protein	94	asnB	-11.89	asparagine synthetase B
95	N/A	-11.09	Derived by automated computational analysis using gene prediction method: Protein Homology.	95	araD	-18.42	L-ribulose-5-phosphate 4-epimerase AraD	95	H0506_RS00480	-10.81	NAD(P)-dependent oxidoreductase	95	H0506_RS07985	-10.88	30S ribosomal protein S18	95	ccpA	-17.35	catabolite control protein A	95	levE	-14.36	PTS mannose/fructose/sorbose transporter subunit IIB	95	H0506_RS09370	-26.65	amidase	95	trmFO	-10.6	FADH(2)-oxidizing methylenetetrahydrofolate--tRNA-(uracil(54)-C(5))- methyltransferase TrmFO	95	liang_rs09640	-17.17	ABC transporter ATP-binding protein	95	liang_rs13200	-10.3	cell surface protein
96	rpoB	-11.03	DNA-directed RNA polymerase subunit beta	96	rpoB	-18.74	DNA-directed RNA polymerase subunit beta	96	N/A	-13.12	Derived by automated computational analysis using gene prediction method: Protein Homology.	96	sufD	-10.88	Fe-S cluster assembly protein SufD	96	H0506_RS05170	-17.39	GNAT family N-acetyltransferase	96	SGO_1619	-12.98	cation transporter E1-E2 family ATPase	96	adcA	-11.86	zinc ABC transporter substrate-binding protein AdcA	96	N/A	-16.8	Derived by automated computational analysis using gene prediction method: Protein Homology.	96	trpA	-11.73	tryptophan synthase subunit alpha	96	arsR	-10.9	ArsR family transcriptional regulator
97	N/A	-11.14	Derived by automated computational analysis using gene prediction method: Protein Homology.	97	mreC	-16.25	rod shape-determining protein MreC	97	N/A	-11.07	Derived by automated computational analysis using gene prediction method: Protein Homology.	97	N/A	-10.87	Derived by automated computational analysis using gene prediction method: Protein Homology.	97	N/A	-17.29	Derived by automated computational analysis using gene prediction method: Protein Homology.	97	fetB	-15.56	iron ABC transporter permease	97	msrB	-13.08	peptide-methionine (R)-S-oxide reductase	97	dapB	-13.28	4-hydroxy-tetrahydrodipicolinate reductase	97	brnQ	-11.22	branched-chain amino acid transport system II carrier protein	97	liang_rs03995	-10.24	prolyl-tRNA synthetase associated domain-containing protein
98	lepB	-12.72	peptidase	98	N/A	-18.64	Derived by automated computational analysis using gene prediction method: Protein Homology.	98	rpsO	-14.48	30S ribosomal protein S15	98	SR187_RS09275	-10.79	DUF3284 domain-containing protein	98	H0506_RS01585	-17.26	MFS transporter	98	rlmD	-14.53	23S rRNA (uracil(1939)-C(5))-methyltransferase RlmD	98	H0506_RS07005	-18.37	bifunctional folylpolyglutamate synthase/dihydrofolate synthase	98	AMM49_RS09010	-15.82	PTS sugar transporter subunit IIC	98	rplC	-11.2	50S ribosomal protein L3	98	purR	-11.93	pur operon repressor
99	H0506_RS01365	-11.03	acylphosphatase	99	BCI01S_RS24880	-18.61	DUF3923 domain-containing protein	99	H0506_RS07445	-14.69	cysteine hydrolase	99	ohr	-10.9	OsmC/Ohr family protein	99	ydcF	-14.61	YdcF family protein	99	SMA_0800	-16.35	iron compound ABC uptake transporter ATP-binding protein	99	grpE	-12.6	nucleotide exchange factor GrpE	99	N/A	-17.83	amino acid transporter amino acid-binding protein	99	liang_rs02090	-11.36	oxidoreductase	99	lspA	-12.65	signal peptidase II
100	ADG87_RS03670	-11.14	VanZ like protein RDD	100	AVT04_RS07825	-17.64	serine/threonine protein kinase	100	bglG	-15.24	transcriptional antiterminator	100	H0506_RS04485	-10.75	ABC transporter permease	100	celB	-13.06	cellobiose phosphotransferase system IIB component	100	N/A	-15.41	Derived by automated computational analysis using gene prediction method: Protein Homology.	100	H0506_RS05560	-21.33	DegV family protein	100	yidC	-16.89	protein translocase component YidC	100	LIU_RS02790	-11.13	DUF1622 domain-containing protein	100	ogt	-11.7	methylated-DNA--protein-cysteine methyltransferase
